# Supplementary material for: Agrobacterium sp.-derived β-1,3-glucan enhances natural killer cell activity in healthy adults: a randomized, double-blind, placebo-controlled, parallel-group study
Source: PubMed Central journal article supplement — Nutr Res Pract. 2017 Jan 24;11(1):43–50. doi: 10.4162/nrp.2017.11.1.43 (PMC5300946; doi:10.4162/nrp.2017.11.1.43), 2017-01-24
Supplement: nrp-11-43-s001.pdf [file nrp-11-43-s001.pdf]

**Supplemental Table 1.** Nutrient intake of the  $\beta$ -glucan and placebo groups<sup>1)</sup>

|                                    | $\beta$ -glucan (n = 40)         |                       | Placebo (n = 37)                 |                       |
|------------------------------------|----------------------------------|-----------------------|----------------------------------|-----------------------|
|                                    | Baseline                         | Week 8                | Baseline                         | Week 8                |
| Energy (kcal)                      | 2,015.9 $\pm$ 637.7              | 1,976.5 $\pm$ 498.0   | 1,800.8 $\pm$ 513.1              | 1,766.7 $\pm$ 625.5   |
| Carbohydrate (g)                   | 291.21 $\pm$ 79.95 <sup>2)</sup> | 267.67 $\pm$ 70.68    | 255.33 $\pm$ 70.85 <sup>2)</sup> | 243.10 $\pm$ 84.88    |
| Lipid (g)                          | 61.35 $\pm$ 32.44                | 63.65 $\pm$ 30.71     | 57.68 $\pm$ 25.94                | 56.47 $\pm$ 28.13     |
| Protein (g)                        | 77.98 $\pm$ 31.80                | 78.99 $\pm$ 23.47     | 69.12 $\pm$ 24.30                | 72.52 $\pm$ 30.85     |
| Fiber (g)                          | 22.82 $\pm$ 10.36                | 23.21 $\pm$ 9.54      | 19.46 $\pm$ 7.29                 | 17.66 $\pm$ 6.55      |
| Vitamin A ( $\mu$ g RE)            | 1,110.7 $\pm$ 973.8              | 995.5 $\pm$ 644.0     | 802.3 $\pm$ 392.7                | 724.7 $\pm$ 380.0     |
| Vitamin D ( $\mu$ g)               | 3.15 $\pm$ 3.98                  | 3.64 $\pm$ 5.05       | 4.13 $\pm$ 5.17                  | 4.81 $\pm$ 8.93       |
| Vitamin E (mg)                     | 20.51 $\pm$ 10.97                | 19.98 $\pm$ 10.12     | 18.18 $\pm$ 7.84                 | 16.95 $\pm$ 9.55      |
| Vitamin K ( $\mu$ g)               | 256.03 $\pm$ 238.56              | 272.83 $\pm$ 245.91   | 209.83 $\pm$ 184.34              | 152.33 $\pm$ 116.46   |
| Vitamin C (mg)                     | 139.73 $\pm$ 211.51              | 134.08 $\pm$ 114.86   | 82.19 $\pm$ 38.52                | 75.52 $\pm$ 47.61     |
| Thiamin (mg)                       | 1.52 $\pm$ 0.64                  | 1.58 $\pm$ 0.58       | 1.28 $\pm$ 0.60                  | 1.20 $\pm$ 0.59       |
| Riboflavin (mg)                    | 1.41 $\pm$ 0.71                  | 1.48 $\pm$ 0.51       | 1.26 $\pm$ 0.44                  | 1.19 $\pm$ 0.52       |
| Niacin (mg)                        | 18.14 $\pm$ 6.58                 | 18.35 $\pm$ 5.68      | 15.44 $\pm$ 6.05                 | 16.10 $\pm$ 7.97      |
| Vitamin B <sub>6</sub> (mg)        | 1.71 $\pm$ 0.74                  | 1.75 $\pm$ 0.75       | 1.42 $\pm$ 0.55                  | 1.43 $\pm$ 0.64       |
| Folate ( $\mu$ g)                  | 531.72 $\pm$ 260.18              | 547.73 $\pm$ 254.69   | 466.25 $\pm$ 207.52              | 416.93 $\pm$ 174.12   |
| Vitamin B <sub>12</sub> ( $\mu$ g) | 7.82 $\pm$ 6.68                  | 7.41 $\pm$ 6.21       | 7.22 $\pm$ 6.33                  | 6.62 $\pm$ 5.55       |
| Pantothenic acid (mg)              | 5.23 $\pm$ 1.95                  | 4.91 $\pm$ 1.74       | 4.47 $\pm$ 1.44                  | 4.44 $\pm$ 1.59       |
| Biotin ( $\mu$ g)                  | 20.33 $\pm$ 13.16                | 20.58 $\pm$ 14.66     | 18.04 $\pm$ 10.40                | 17.58 $\pm$ 9.40      |
| Calcium (mg)                       | 490.82 $\pm$ 254.80              | 518.93 $\pm$ 296.79   | 523.90 $\pm$ 286.39              | 489.70 $\pm$ 279.00   |
| Phosphorus (mg)                    | 1,121.5 $\pm$ 455.3              | 1,117.0 $\pm$ 366.8   | 1,012.4 $\pm$ 351.0              | 990.3 $\pm$ 396.6     |
| Sodium (mg)                        | 4,619.3 $\pm$ 2,432.6            | 4,979.1 $\pm$ 1,820.1 | 4,434.1 $\pm$ 1,898.4            | 4,395.0 $\pm$ 1,935.4 |
| Chlorine (mg)                      | 420.9 $\pm$ 515.9                | 676.2 $\pm$ 1,357.9   | 648.0 $\pm$ 1,257.9              | 343.6 $\pm$ 347.5     |
| Potassium (mg)                     | 3,017.2 $\pm$ 1,199.3            | 3,029.9 $\pm$ 1,217.7 | 2,642.4 $\pm$ 829.8              | 2,488.5 $\pm$ 956.2   |
| Magnesium (mg)                     | 89.58 $\pm$ 51.72                | 94.53 $\pm$ 55.30     | 74.50 $\pm$ 47.63                | 71.92 $\pm$ 37.05     |
| Iron (mg)                          | 15.84 $\pm$ 6.27                 | 15.57 $\pm$ 5.81      | 13.82 $\pm$ 5.10                 | 14.71 $\pm$ 7.21      |
| Zinc (mg)                          | 11.09 $\pm$ 4.40                 | 11.26 $\pm$ 4.08      | 9.76 $\pm$ 3.84                  | 9.61 $\pm$ 3.93       |
| Copper (mg)                        | 1.38 $\pm$ 0.70                  | 1.10 $\pm$ 0.58       | 1.16 $\pm$ 0.50                  | 1.15 $\pm$ 0.56       |
| Manganese (mg)                     | 3.92 $\pm$ 1.43                  | 3.68 $\pm$ 1.76       | 3.39 $\pm$ 1.15                  | 3.14 $\pm$ 1.10       |
| Selenium ( $\mu$ g)                | 100.07 $\pm$ 39.94               | 96.37 $\pm$ 40.29     | 89.08 $\pm$ 39.36                | 93.56 $\pm$ 37.86     |
| Cholesterol (mg)                   | 377.67 $\pm$ 259.76              | 345.22 $\pm$ 223.52   | 358.89 $\pm$ 233.15              | 356.84 $\pm$ 210.72   |

<sup>1)</sup> Values are means  $\pm$  SDs.<sup>2)</sup> *P*-values < 0,05 for differences between the  $\beta$ -glucan and placebo groups at baseline were determined using an independent t-test.
